# Supplementary material
Source: PubMed Central journal article supplement (PMC3742725)
Supplement: NIHMS493584-supplement-supplementary_data.pdf [file NIHMS493584-supplement-supplementary_data.pdf]

**Supporting information** for “Chemical and Steady-State Kinetic Analyses of a Heterologously Expressed Heme-Dependent Chlorite Dismutase”

J.L. DuBois and B.R. Streit

**(1) Protein expression optimization.** For optimization of soluble protein production, cells were inoculated 1:100 into 50 mL fresh LB-kanamycin and grown to an optical density of 0.5 (600 nm) at varying temperatures (15-37 °C). The extent of uninduced protein expression was assessed by SDS polyacrylamide gel electrophoresis (SDS-PAGE) of whole cells over time. The cell optical density, temperature, and amount of IPTG added were then varied, over 0.2-0.7, 15-37 °C, and 0.1-1 mM respectively (data not shown). SDS-PAGE was used to screen for the maximal production of a ~30kDa protein (approximate Cld subunit molecular weight) in the soluble fraction. Subsequently, the effects of added heme or the heme precursor 5-aminolevulinic acid on the activity and approximate heme stoichiometry of the product were assessed. Crystalline hemin (Strem Chemicals) was added to final concentrations ranging from 10-90 μM and the activity and heme:protein stoichiometry determined for the soluble fractions of lysed cells.

**(2) Isoelectric focusing.** The isoelectric points of recombinant and native Cld were determined using isoelectric focusing polyacrylamide gel electrophoresis (IEF-PAGE) on a pH 3.0-10.0 gradient gel (Bio-Rad). The gel was run 60 min at 100 mA, 60 min at 250 mA, and 30 min at 500 mA. Isoelectric focusing standards on the same gel (pIs labeled, Bio-Rad) were used to generate a curve of pI versus migration distance, from which the unknown pIs were determined. The gel for recombinant Cld is pictured here.

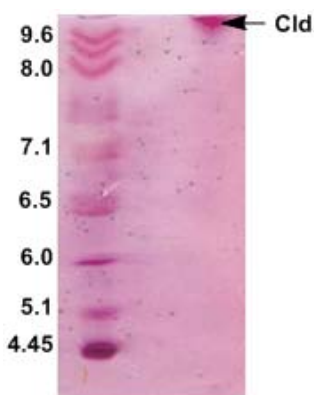

**(3) Determination of  $\text{ClO}_2^-:\text{O}_2$  reaction stoichiometries.** Residual  $\text{ClO}_2^-$  was measured via iodometric titration and  $\text{O}_2$  measured by Clark electrode, as described in the text. The following table gives results for a variety of initial chlorite concentrations tested:

**Table S1.** Stoichiometry of chlorite dismutated versus  $\text{O}_2$  evolved, at various values of [chlorite]

| [Chlorite] (μM) | $\text{ClO}_2^-$ dismutated/ $\text{O}_2$ evolved | Error |
|-----------------|---------------------------------------------------|-------|
| 85              | 1.039117                                          | 0.07  |
| 95              | 0.96                                              | 0.06  |
| 145             | 1.030269                                          | 0.03  |
| 185             | 1.08                                              | 0.07  |
| 205             | 1.07                                              | 0.04  |
| 260             | 0.996926                                          | 0.04  |
| 530             | 1.040964                                          | 0.08  |
| 885             | 1.080748                                          | 0.08  |
| 925             | 1.05                                              | 0.03  |
| 1700            | 1.02                                              | 0.1   |
| 1740            | 0.96467                                           | 0.07  |

Errors are computed as the standard deviation of at least three independent measurements at a particular chlorite concentration. All initial rates were determined in a 100 mM potassium phosphate buffer at pH 6.8 at 4 °C.

#### (4) Inhibitory effects of chloride.

Initial rates of reaction vs.  $[\text{ClO}_2^-]$  (ranging from 0 – 1700  $\mu\text{M}$ ) were measured in the presence of a fixed amount of  $\text{Cl}^-$  ranging from 0 – 200 mM. **Figure S1**: The initial rate data (referenced to heme concentration) for each  $\text{Cl}^-$  concentration were fit to the Henri-Michaelis-Menten equation of the form:  $v/[E] = k_{\text{cat}}[\text{ClO}_2^-]/(K_{\text{app}} + [\text{ClO}_2^-])$ , where  $[E] = [\text{heme}]$  in Cld. The catalytic parameters  $k_{\text{cat}}$  and  $K_{\text{app}}$  were determined for each  $[\text{Cl}^-]$  are shown in **Table S2**. All errors are determined from the standard deviation of at least three independent trials under one  $[\text{Cld}_{\text{heme}}]$ ,  $[\text{ClO}_2^-]$ , and  $[\text{Cl}^-]$ . **Figure S2**: The reciprocal of the initial rate data ( $1/v$ ) was plotted against  $1/[\text{ClO}_2^-]$ . The linearized data are fit to the Lineweaver-Burke equation  $[E]/v = (K_{\text{app}}/k_{\text{cat}})(1/[\text{ClO}_2^-]) + 1/k_{\text{cat}}$ . From the pattern of lines intersecting to the left of the y-axis and below the x-axis, it was determined that  $\text{Cl}^-$  acted as a hyperbolic mixed type inhibitor<sup>‡</sup> **Figure S3**: Replots of  $1/\Delta\text{slope}$  and  $1/\Delta\text{intercept}$  (where the change is measured relative to a no-chloride plot) versus  $1/[\text{chloride}]$  were generated from the data in **Figure S2**. Taking into account  $\text{Cl}^-$ 's ability to bind to E or ES to form EI or ESI, the equation describing hyperbolic mixed type inhibition is of the form:  $v/k_{\text{cat}} = [\text{ClO}_2^-]/((K_{\text{app}}(1+([\text{Cl}^-](\alpha-\beta)/(\beta[\text{Cl}^-]+\alpha K_i))) + [\text{ClO}_2^-](1+([\text{Cl}^-](1-\beta)/(\beta[\text{Cl}^-] + \alpha K_i))))$ .<sup>‡</sup> This yields equations for  $1/\Delta\text{slope} = (\alpha K_i k_{\text{cat}}/(K_s(\alpha-\beta)))(1/[\text{Cl}^-]) + \beta k_{\text{cat}}/(K_s(\alpha-\beta))$  and  $1/\Delta\text{intercept} = (\alpha K_i k_{\text{cat}}/(1-\beta))(1/[I]) + \beta k_{\text{cat}}/(1-\beta)$ . (Segal) From the linear fits to the data in **Figure S3**, values of  $\alpha = 0.425$ ,  $\beta = 0.484$ , and  $K_I = 225$  mM were determined where  $\Delta\text{slope y-intercept} = \beta k_{\text{cat}}/(K_s(\alpha-\beta))$ ,  $\Delta\text{intercept y-intercept} = \beta k_{\text{cat}}/(1-\beta)$  and the intersection point of the two lines =  $-\beta/(\alpha K_i)$ .<sup>‡</sup>

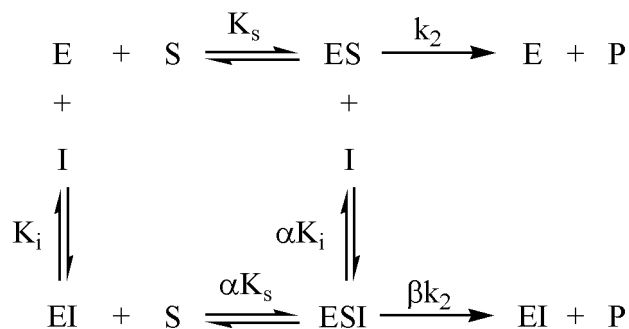

In order to better understand whether the effects due to chloride were anion-specific, or whether they might be attributed simply to the effects of ionic strength, enzyme activity in increasing amounts of chloride and triflate ( $\text{CF}_3\text{SO}_3^-$ ) was measured. The amount of activity relative to that in the absence of any added anion was plotted versus  $[\text{anion}]$  (**Figure S4**) as a dose-response curve. Triflate is a large anion that is known to coordinate only weakly to metals. Hence, we expected it would interact minimally with the heme containing active site. As shown in **Figure S4**, however, triflate had an even greater effect on enzyme activity than chloride. Hence, the effects due to chloride are likely not simply due to increases in ionic strength.

<sup>‡</sup> Segel, Irwin H., *Enzyme Kinetics: Behavior and Analysis of Rapid Equilibrium and Steady-State Enzyme Systems*, Wiley-Interscience, Edition 1, 1993, Chapter 4, ISBN 0-471-30309-7

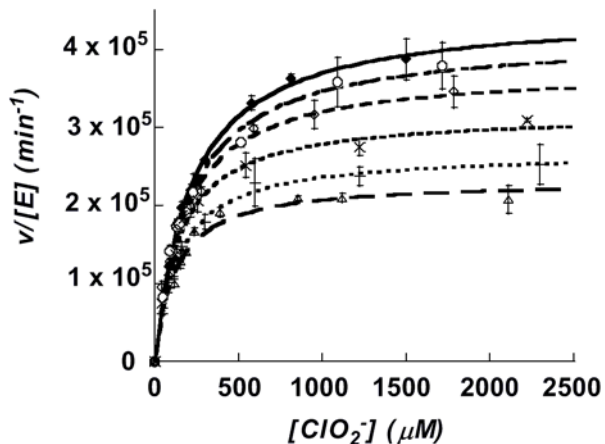

**Figure S1:** Overlay of the Michaelis Menten plots of  $\text{Cl}^-$  inhibition. 0 mM  $\text{Cl}^-$  (—,  $\blacklozenge$ ); 20 mM  $\text{Cl}^-$  (—,  $\circ$ ); 50 mM  $\text{Cl}^-$  (—,  $\diamond$ ), 100 mM  $\text{Cl}^-$  (—, X); 150 mM  $\text{Cl}^-$  (—, +); 200 mM  $\text{Cl}^-$  (—,  $\Delta$ ).

**Table S2:** Catalytic constants of  $\text{ClO}_2^-$  dismutation in the presence of  $\text{Cl}^-$ .

| $[\text{Cl}^-]$ (mM) | $K_m$ (app.) ( $\mu\text{M}$ ) | $k_{\text{cat}}$ (app.) ( $\times 10^5$ ) ( $\text{min}^{-1}$ ) |
|----------------------|--------------------------------|-----------------------------------------------------------------|
| 0                    | $212 \pm 12$                   | $4.50 \pm 0.08$                                                 |
| 20                   | $202 \pm 14$                   | $4.2 \pm 0.1$                                                   |
| 50                   | $172 \pm 15$                   | $3.76 \pm 0.1$                                                  |
| 100                  | $144 \pm 10$                   | $3.20 \pm 0.07$                                                 |
| 150                  | $138 \pm 8$                    | $2.70 \pm 0.06$                                                 |
| 200                  | $118 \pm 17$                   | $2.32 \pm 0.08$                                                 |

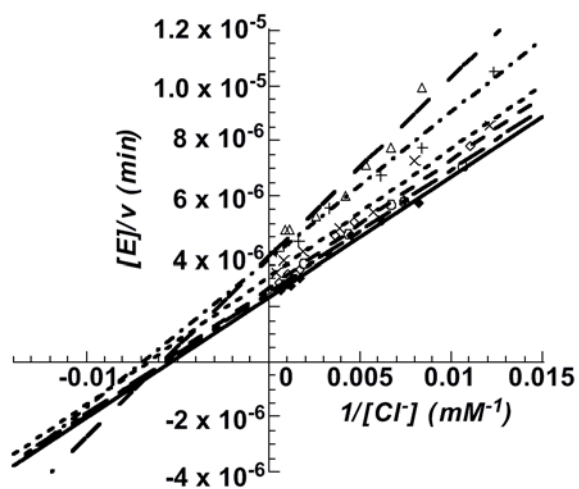

**Figure S2.** Lineweaver Burke plot of  $\text{Cl}^-$  inhibition. 0 mM  $\text{Cl}^-$  (—,  $\blacklozenge$ ); 20 mM  $\text{Cl}^-$  (—,  $\circ$ ); 50 mM  $\text{Cl}^-$  (—,  $\diamond$ ), 100 mM  $\text{Cl}^-$  (—, X); 150 mM  $\text{Cl}^-$  (—, +); 200 mM  $\text{Cl}^-$  (—,  $\Delta$ ).

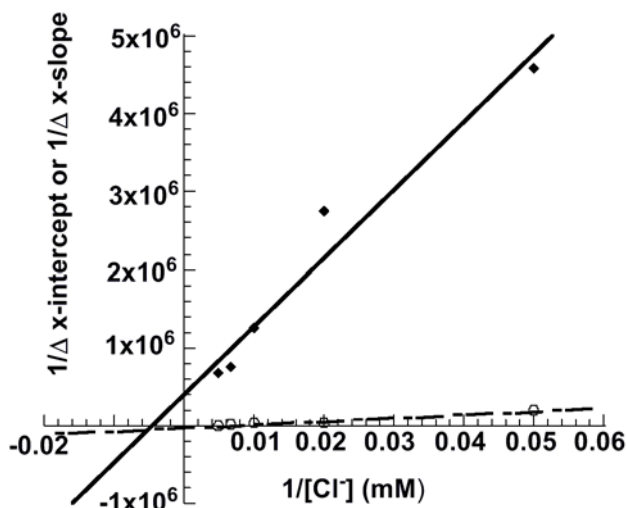

**Figure S3:**  $1/\Delta$ slope and  $1/\Delta$ intercept replots of  $\text{Cl}^-$  inhibition reciprocal data.  $1/\Delta$  intercept values ( $\blacklozenge$ , solid line)  $1/\Delta$  slope values ( $\circ$ , dashed line).

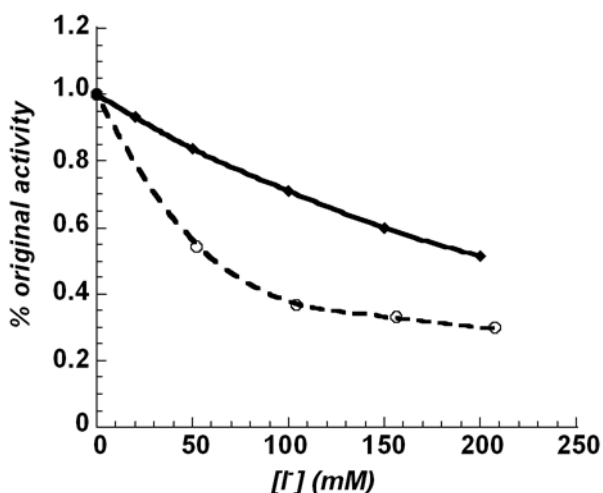

**Figure S4:** A dose response curve was measured to determine inhibition of  $\text{Cl}^-$  activity by either  $\text{Cl}^-$  (—,  $\blacklozenge$ ) or triflate anion ( $\text{OTf}^-$ ) (-----,  $\circ$ ). In the presence of a normally saturating amount of  $\text{ClO}_2^-$  ( $2200 \mu\text{M}$ ) progress of reaction curves were measured in increasing concentrations of salts (either  $\text{Cl}^-$  ion from  $\text{NaCl}$  or by triflate ion from sodium triflate) using a Clark type oxygen electrode as described in the experimental section. Points are fit with a smooth curve for ease of visualizing trend.

**(5) Guaiacol protection against inactivation.** In order to determine the extent to which guaiacol could protect the enzyme from chlorite-dependent inactivation, samples of enzyme ( $210 \text{ nM}$  heme) were incubated with chlorite and increasing quantities of guaiacol.

A chlorite:heme ratio of  $5.0 \times 10^4$  was used in each case. This amount of chlorite is slightly above the extrapolated turnover number for the enzyme ( $1.7 \times 10^4$  molecules of chlorite per heme; see text). (Note that the enzyme does have a small amount of residual activity at this chlorite concentration, as indicated in **Figure 6**, however, potentially due to product protection by  $\text{Cl}^-$ .) Specific activities were determined via monitoring the change in  $\text{O}_2$  concentration using a Clark type oxygen electrode as described in the experimental section. By comparing the guaiacol incubated samples against a control sample (no guaiacol or chlorite in initial incubation before buffer exchange) the % activity remaining of each sample could be determined; in effect this is a measure of the amount of enzyme inactivated during the initial chlorite

incubation. Concentrations of guaiacol ranging from 0 – 3500 mM were tested with final guaiacol:heme ratios ranging from 0 – 16600. The plot indicates that the effect of guaiacol saturates at relatively low concentrations, e.g., by ~500 mM (~2380 equivalents per heme). Hence, at the amount of guaiacol used in generating **Figure 6** in the text (600  $\mu$ M), its effect should be as great as possible.

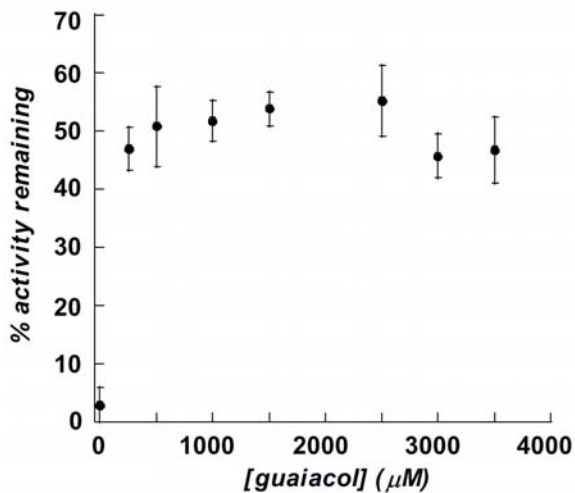

**Figure S5:** Dose response curve showing guaiacol's prevention of suicide inactivation of Cld.
